# Supplementary material for: Responsiveness to pulmonary rehabilitation in COPD is associated with changes in microbiota
Source: PubMed Central journal article supplement (PMC9875510; doi:10.1186/s12931-023-02339-z), 2023-01-25
Supplement: 12931_2023_2339_MOESM3_ESM.pdf [file 12931_2023_2339_MOESM3_ESM.pdf]

|           | #16s_sampleID                | Subject    | Monthcat | Group   | mBorg     | 6MWT      | CAT       |
|-----------|------------------------------|------------|----------|---------|-----------|-----------|-----------|
| Sample_1  | 16s_sampl 3R451_FU:3R451_FU: | subject3R4 | M0       | Control | Not apply | Not apply | Not apply |
| Sample_2  | 16s_sampl 3R452_FU:3R452_FU: | subject3R4 | M0       | Control | Not apply | Not apply | Not apply |
| Sample_3  | 16s_sampl 3R_455_M3R_455_M   | subject3R4 | M0       | Control | Not apply | Not apply | Not apply |
| Sample_4  | 16s_sampl 508_FU1_f508_FU1_f | subject508 | M0       | Control | Not apply | Not apply | Not apply |
| Sample_5  | 16s_sampl 509_FU1_f509_FU1_f | subject509 | M0       | Control | Not apply | Not apply | Not apply |
| Sample_6  | 16s_sampl 519_M1_p519_M1_p   | subject519 | M0       | Control | Not apply | Not apply | Not apply |
| Sample_7  | 16s_sampl 526_FU1_f526_FU1_f | subject526 | M0       | Control | Not apply | Not apply | Not apply |
| Sample_8  | 16s_sampl 527_FU1_f527_FU1_f | subject527 | M0       | Control | Not apply | Not apply | Not apply |
| Sample_9  | 16s_sampl 540_M1_L540_M1_L   | subject540 | M0       | Control | Not apply | Not apply | Not apply |
| Sample_10 | 16s_sampl 578_M1_L578_M1_L   | subject578 | M0       | Control | Not apply | Not apply | Not apply |
| Sample_11 | 16s_sampl 583_FU1_f583_FU1_f | subject583 | M0       | Control | Not apply | Not apply | Not apply |
| Sample_12 | 16s_sampl 649_FU1_f649_FU1_f | subject649 | M0       | Control | Not apply | Not apply | Not apply |
| Sample_13 | 16s_sampl 663_M1_L663_M1_L   | subject663 | M0       | Control | Not apply | Not apply | Not apply |
| Sample_14 | 16s_sampl 665_M1_p665_M1_p   | subject665 | M0       | Control | Not apply | Not apply | Not apply |
| Sample_15 | 16s_sampl 676_M1_L676_M1_L   | subject676 | M0       | Control | Not apply | Not apply | Not apply |
| Sample_16 | 16s_sampl 678_M1_p678_M1_p   | subject678 | M0       | Control | Not apply | Not apply | Not apply |
| Sample_17 | 16s_sampl 694_M1_p694_M1_p   | subject694 | M0       | Control | Not apply | Not apply | Not apply |
| Sample_18 | 16s_sampl 695_M1_L695_M1_L   | subject695 | M0       | Control | Not apply | Not apply | Not apply |
| Sample_19 | 16s_sampl 794_FU1_f794_FU1_f | subject794 | M0       | Control | Not apply | Not apply | Not apply |
| Sample_20 | 16s_sampl 795_FU1_f795_FU1_f | subject795 | M0       | Control | Not apply | Not apply | Not apply |
| Sample_21 | 16s_sampl 801_FU1_f801_FU1_f | subject801 | M0       | Control | Not apply | Not apply | Not apply |
| Sample_22 | 16s_sampl 807_FU1_f807_FU1_f | subject807 | M0       | Control | Not apply | Not apply | Not apply |
| Sample_23 | 16s_sampl 809_FU1_f809_FU1_f | subject809 | M0       | Control | Not apply | Not apply | Not apply |
| Sample_24 | 16s_sampl 830_FU1_f830_FU1_f | subject830 | M0       | Control | Not apply | Not apply | Not apply |
| Sample_25 | 16s_sampl 833_FU1_f833_FU1_f | subject833 | M0       | Control | Not apply | Not apply | Not apply |
| Sample_26 | 16s_sampl 837_M1_L837_M1_L   | subject837 | M0       | Control | Not apply | Not apply | Not apply |
| Sample_27 | 16s_sampl 851_FU1_f851_FU1_f | subject851 | M0       | Control | Not apply | Not apply | Not apply |
| Sample_28 | 16s_sampl 880_M1_L880_M1_L   | subject880 | M0       | Control | Not apply | Not apply | Not apply |
| Sample_29 | 16s_sampl 884_M1_L884_M1_L   | subject884 | M0       | Control | Not apply | Not apply | Not apply |
| Sample_30 | 16s_sampl 885_M1_p885_M1_p   | subject885 | M0       | Control | Not apply | Not apply | Not apply |
| Sample_31 | 16s_sampl 891_M1_L891_M1_L   | subject891 | M0       | Control | Not apply | Not apply | Not apply |
| Sample_32 | 16s_sampl 897_M1_L897_M1_L   | subject897 | M0       | Control | Not apply | Not apply | Not apply |
| Sample_33 | 16s_sampl 907_M1_L907_M1_L   | subject907 | M0       | Control | Not apply | Not apply | Not apply |
| Sample_34 | 16s_sampl 934_M1_L934_M1_L   | subject934 | M0       | Control | Not apply | Not apply | Not apply |
| Sample_35 | 16s_sampl 935_FU1_f935_FU1_f | subject935 | M0       | Control | Not apply | Not apply | Not apply |
| Sample_36 | 16s_sampl P101_FU1_P101_FU1_ | subjectP10 | M0       | Control | Not apply | Not apply | Not apply |
| Sample_37 | 16s_sampl P201_FU1_P201_FU1_ | subjectP20 | M0       | Control | Not apply | Not apply | Not apply |
| Sample_38 | 16s_sampl P204_FU1_P204_FU1_ | subjectP20 | M0       | Control | Not apply | Not apply | Not apply |
| Sample_39 | 16s_sampl 3R451_FU:3R451_FU: | subject3R4 | M1       | Control | Not apply | Not apply | Not apply |
| Sample_40 | 16s_sampl 3R452_FU:3R452_FU: | subject3R4 | M1       | Control | Not apply | Not apply | Not apply |
| Sample_41 | 16s_sampl 3R_455_M3R_455_M   | subject3R4 | M1       | Control | Not apply | Not apply | Not apply |
| Sample_42 | 16s_sampl 508_FU2_f508_FU2_f | subject508 | M1       | Control | Not apply | Not apply | Not apply |
| Sample_43 | 16s_sampl 509_FU2_f509_FU2_f | subject509 | M1       | Control | Not apply | Not apply | Not apply |
| Sample_44 | 16s_sampl 519_M2_p519_M2_p   | subject519 | M1       | Control | Not apply | Not apply | Not apply |
| Sample_45 | 16s_sampl 526_FU2_f526_FU2_f | subject526 | M1       | Control | Not apply | Not apply | Not apply |
| Sample_46 | 16s_sampl 527_FU2_f527_FU2_f | subject527 | M1       | Control | Not apply | Not apply | Not apply |
| Sample_47 | 16s_sampl 540_M2_L540_M2_L   | subject540 | M1       | Control | Not apply | Not apply | Not apply |
| Sample_48 | 16s_sampl 578_M2_L578_M2_L   | subject578 | M1       | Control | Not apply | Not apply | Not apply |
| Sample_49 | 16s_sampl 583_FU2_f583_FU2_f | subject583 | M1       | Control | Not apply | Not apply | Not apply |
| Sample_50 | 16s_sampl 649_FU2_f649_FU2_f | subject649 | M1       | Control | Not apply | Not apply | Not apply |

|                                                      |         |           |           |           |
|------------------------------------------------------|---------|-----------|-----------|-----------|
| Sample_5116s_sampl 663_M2_L 663_M2_L subject663 M1   | Control | Not apply | Not apply | Not apply |
| Sample_5216s_sampl 665_M2_p 665_M2_p subject665 M1   | Control | Not apply | Not apply | Not apply |
| Sample_5316s_sampl 676_M2_L 676_M2_L subject676 M1   | Control | Not apply | Not apply | Not apply |
| Sample_5416s_sampl 678_M2_p 678_M2_p subject678 M1   | Control | Not apply | Not apply | Not apply |
| Sample_5516s_sampl 694_M2_p 694_M2_p subject694 M1   | Control | Not apply | Not apply | Not apply |
| Sample_5616s_sampl 695_M2_L 695_M2_L subject695 M1   | Control | Not apply | Not apply | Not apply |
| Sample_5716s_sampl 794_FU2_f 794_FU2_f subject794 M1 | Control | Not apply | Not apply | Not apply |
| Sample_5816s_sampl 795_FU2_f 795_FU2_f subject795 M1 | Control | Not apply | Not apply | Not apply |
| Sample_5916s_sampl 801_FU2_f 801_FU2_f subject801 M1 | Control | Not apply | Not apply | Not apply |
| Sample_6016s_sampl 807_FU2_f 807_FU2_f subject807 M1 | Control | Not apply | Not apply | Not apply |
| Sample_6116s_sampl 809_FU2_f 809_FU2_f subject809 M1 | Control | Not apply | Not apply | Not apply |
| Sample_6216s_sampl 830_FU2_f 830_FU2_f subject830 M1 | Control | Not apply | Not apply | Not apply |
| Sample_6316s_sampl 833_FU2_f 833_FU2_f subject833 M1 | Control | Not apply | Not apply | Not apply |
| Sample_6416s_sampl 837_M2_L 837_M2_L subject837 M1   | Control | Not apply | Not apply | Not apply |
| Sample_6516s_sampl 851_FU2_f 851_FU2_f subject851 M1 | Control | Not apply | Not apply | Not apply |
| Sample_6616s_sampl 880_M2_L 880_M2_L subject880 M1   | Control | Not apply | Not apply | Not apply |
| Sample_6716s_sampl 884_M2_L 884_M2_L subject884 M1   | Control | Not apply | Not apply | Not apply |
| Sample_6816s_sampl 885_M2_p 885_M2_p subject885 M1   | Control | Not apply | Not apply | Not apply |
| Sample_6916s_sampl 891_M2_L 891_M2_L subject891 M1   | Control | Not apply | Not apply | Not apply |
| Sample_7016s_sampl 897_M2_L 897_M2_L subject897 M1   | Control | Not apply | Not apply | Not apply |
| Sample_7116s_sampl 907_M2_L 907_M2_L subject907 M1   | Control | Not apply | Not apply | Not apply |
| Sample_7216s_sampl 934_M2_L 934_M2_L subject934 M1   | Control | Not apply | Not apply | Not apply |
| Sample_7316s_sampl 935_FU2_f 935_FU2_f subject935 M1 | Control | Not apply | Not apply | Not apply |
| Sample_7416s_sampl P101_FU2_P101_FU2 subjectP10 M1   | Control | Not apply | Not apply | Not apply |
| Sample_7516s_sampl P201_FU2_P201_FU2 subjectP20 M1   | Control | Not apply | Not apply | Not apply |
| Sample_7616s_sampl P204_FU2_P204_FU2 subjectP20 M1   | Control | Not apply | Not apply | Not apply |
| Sample_7716s_sampl 3R451_FU:3R451_FU: subject3R4 M2  | Control | Not apply | Not apply | Not apply |
| Sample_7816s_sampl 3R452_FU:3R452_FU: subject3R4 M2  | Control | Not apply | Not apply | Not apply |
| Sample_7916s_sampl 3R_455_M3R_455_M subject3R4 M2    | Control | Not apply | Not apply | Not apply |
| Sample_8016s_sampl 508_FU3_f 508_FU3_f subject508 M2 | Control | Not apply | Not apply | Not apply |
| Sample_8116s_sampl 509_FU3_f 509_FU3_f subject509 M2 | Control | Not apply | Not apply | Not apply |
| Sample_8216s_sampl 519_M3_p 519_M3_p subject519 M2   | Control | Not apply | Not apply | Not apply |
| Sample_8316s_sampl 526_FU3_f 526_FU3_f subject526 M2 | Control | Not apply | Not apply | Not apply |
| Sample_8416s_sampl 527_FU3_f 527_FU3_f subject527 M2 | Control | Not apply | Not apply | Not apply |
| Sample_8516s_sampl 540_M3_L 540_M3_L subject540 M2   | Control | Not apply | Not apply | Not apply |
| Sample_8616s_sampl 578_M3_L 578_M3_L subject578 M2   | Control | Not apply | Not apply | Not apply |
| Sample_8716s_sampl 583_FU3_f 583_FU3_f subject583 M2 | Control | Not apply | Not apply | Not apply |
| Sample_8816s_sampl 649_FU3_f 649_FU3_f subject649 M2 | Control | Not apply | Not apply | Not apply |
| Sample_8916s_sampl 663_M3_L 663_M3_L subject663 M2   | Control | Not apply | Not apply | Not apply |
| Sample_9016s_sampl 665_M3_p 665_M3_p subject665 M2   | Control | Not apply | Not apply | Not apply |
| Sample_9116s_sampl 676_M3_L 676_M3_L subject676 M2   | Control | Not apply | Not apply | Not apply |
| Sample_9216s_sampl 678_M3_p 678_M3_p subject678 M2   | Control | Not apply | Not apply | Not apply |
| Sample_9316s_sampl 694_M3_p 694_M3_p subject694 M2   | Control | Not apply | Not apply | Not apply |
| Sample_9416s_sampl 695_M3_L 695_M3_L subject695 M2   | Control | Not apply | Not apply | Not apply |
| Sample_9516s_sampl 794_FU3_f 794_FU3_f subject794 M2 | Control | Not apply | Not apply | Not apply |
| Sample_9616s_sampl 795_FU3_f 795_FU3_f subject795 M2 | Control | Not apply | Not apply | Not apply |
| Sample_9716s_sampl 801_FU3_f 801_FU3_f subject801 M2 | Control | Not apply | Not apply | Not apply |
| Sample_9816s_sampl 807_FU3_f 807_FU3_f subject807 M2 | Control | Not apply | Not apply | Not apply |
| Sample_9916s_sampl 809_FU3_f 809_FU3_f subject809 M2 | Control | Not apply | Not apply | Not apply |
| Sample_1016s_sampl 830_FU3_f 830_FU3_f subject830 M2 | Control | Not apply | Not apply | Not apply |
| Sample_1016s_sampl 833_FU3_f 833_FU3_f subject833 M2 | Control | Not apply | Not apply | Not apply |

|                                                      |         |           |           |           |
|------------------------------------------------------|---------|-----------|-----------|-----------|
| Sample_1C16s_sampl 837_M3_L 837_M3_L subject837 M2   | Control | Not apply | Not apply | Not apply |
| Sample_1C16s_sampl 851_FU3_† 851_FU3_† subject851 M2 | Control | Not apply | Not apply | Not apply |
| Sample_1C16s_sampl 880_M3_L 880_M3_L subject880 M2   | Control | Not apply | Not apply | Not apply |
| Sample_1C16s_sampl 884_M3_L 884_M3_L subject884 M2   | Control | Not apply | Not apply | Not apply |
| Sample_1C16s_sampl 885_M3_p 885_M3_p subject885 M2   | Control | Not apply | Not apply | Not apply |
| Sample_1C16s_sampl 891_M3_L 891_M3_L subject891 M2   | Control | Not apply | Not apply | Not apply |
| Sample_1C16s_sampl 897_M3_L 897_M3_L subject897 M2   | Control | Not apply | Not apply | Not apply |
| Sample_1C16s_sampl 907_M3_L 907_M3_L subject907 M2   | Control | Not apply | Not apply | Not apply |
| Sample_1116s_sampl 934_M3_L 934_M3_L subject934 M2   | Control | Not apply | Not apply | Not apply |
| Sample_1116s_sampl 935_FU3_† 935_FU3_† subject935 M2 | Control | Not apply | Not apply | Not apply |
| Sample_1116s_sampl P101_FU3_ P101_FU3_ subjectP10 M2 | Control | Not apply | Not apply | Not apply |
| Sample_1116s_sampl P201_FU3_ P201_FU3_ subjectP20 M2 | Control | Not apply | Not apply | Not apply |
| Sample_1116s_sampl P204_FU3_ P204_FU3_ subjectP20 M2 | Control | Not apply | Not apply | Not apply |
| Sample_1116s_sampl 3R451_FU_ 3R451_FU_ subject3R4 M3 | Control | Not apply | Not apply | Not apply |
| Sample_1116s_sampl 3R452_FU_ 3R452_FU_ subject3R4 M3 | Control | Not apply | Not apply | Not apply |
| Sample_1116s_sampl 3R_455_M 3R_455_M subject3R4 M3   | Control | Not apply | Not apply | Not apply |
| Sample_1116s_sampl 508_FU4_† 508_FU4_† subject508 M3 | Control | Not apply | Not apply | Not apply |
| Sample_1116s_sampl 509_FU4_† 509_FU4_† subject509 M3 | Control | Not apply | Not apply | Not apply |
| Sample_1216s_sampl 519_M4_p 519_M4_p subject519 M3   | Control | Not apply | Not apply | Not apply |
| Sample_1216s_sampl 526_FU4_† 526_FU4_† subject526 M3 | Control | Not apply | Not apply | Not apply |
| Sample_1216s_sampl 527_FU4_† 527_FU4_† subject527 M3 | Control | Not apply | Not apply | Not apply |
| Sample_1216s_sampl 540_M4_L 540_M4_L subject540 M3   | Control | Not apply | Not apply | Not apply |
| Sample_1216s_sampl 578_M4_L 578_M4_L subject578 M3   | Control | Not apply | Not apply | Not apply |
| Sample_1216s_sampl 583_FU4_† 583_FU4_† subject583 M3 | Control | Not apply | Not apply | Not apply |
| Sample_1216s_sampl 649_FU4_† 649_FU4_† subject649 M3 | Control | Not apply | Not apply | Not apply |
| Sample_1216s_sampl 663_M4_L 663_M4_L subject663 M3   | Control | Not apply | Not apply | Not apply |
| Sample_1216s_sampl 665_M4_p 665_M4_p subject665 M3   | Control | Not apply | Not apply | Not apply |
| Sample_1216s_sampl 676_M4_L 676_M4_L subject676 M3   | Control | Not apply | Not apply | Not apply |
| Sample_1316s_sampl 678_M4_p 678_M4_p subject678 M3   | Control | Not apply | Not apply | Not apply |
| Sample_1316s_sampl 694_M4_p 694_M4_p subject694 M3   | Control | Not apply | Not apply | Not apply |
| Sample_1316s_sampl 695_M4_L 695_M4_L subject695 M3   | Control | Not apply | Not apply | Not apply |
| Sample_1316s_sampl 794_FU4_† 794_FU4_† subject794 M3 | Control | Not apply | Not apply | Not apply |
| Sample_1316s_sampl 795_FU4_† 795_FU4_† subject795 M3 | Control | Not apply | Not apply | Not apply |
| Sample_1316s_sampl 801_FU4_† 801_FU4_† subject801 M3 | Control | Not apply | Not apply | Not apply |
| Sample_1316s_sampl 807_FU4_† 807_FU4_† subject807 M3 | Control | Not apply | Not apply | Not apply |
| Sample_1316s_sampl 809_FU4_† 809_FU4_† subject809 M3 | Control | Not apply | Not apply | Not apply |
| Sample_1316s_sampl 830_FU4_† 830_FU4_† subject830 M3 | Control | Not apply | Not apply | Not apply |
| Sample_1316s_sampl 833_FU4_† 833_FU4_† subject833 M3 | Control | Not apply | Not apply | Not apply |
| Sample_1416s_sampl 837_M4_L 837_M4_L subject837 M3   | Control | Not apply | Not apply | Not apply |
| Sample_1416s_sampl 851_FU4_† 851_FU4_† subject851 M3 | Control | Not apply | Not apply | Not apply |
| Sample_1416s_sampl 880_M4_L 880_M4_L subject880 M3   | Control | Not apply | Not apply | Not apply |
| Sample_1416s_sampl 884_M4_L 884_M4_L subject884 M3   | Control | Not apply | Not apply | Not apply |
| Sample_1416s_sampl 885_M4_p 885_M4_p subject885 M3   | Control | Not apply | Not apply | Not apply |
| Sample_1416s_sampl 891_M4_L 891_M4_L subject891 M3   | Control | Not apply | Not apply | Not apply |
| Sample_1416s_sampl 897_M4_L 897_M4_L subject897 M3   | Control | Not apply | Not apply | Not apply |
| Sample_1416s_sampl 907_M4_L 907_M4_L subject907 M3   | Control | Not apply | Not apply | Not apply |
| Sample_1416s_sampl 934_M4_L 934_M4_L subject934 M3   | Control | Not apply | Not apply | Not apply |
| Sample_1416s_sampl 935_FU4_† 935_FU4_† subject935 M3 | Control | Not apply | Not apply | Not apply |
| Sample_1516s_sampl P101_FU4_ P101_FU4_ subjectP10 M3 | Control | Not apply | Not apply | Not apply |
| Sample_1516s_sampl P201_FU4_ P201_FU4_ subjectP20 M3 | Control | Not apply | Not apply | Not apply |
| Sample_1516s_sampl P204_FU4_ P204_FU4_ subjectP20 M3 | Control | Not apply | Not apply | Not apply |

|                                                     |         |           |           |           |
|-----------------------------------------------------|---------|-----------|-----------|-----------|
| Sample_1516s_sampl 3R451_FU!3R451_FU!subject3R4 M4  | Control | Not apply | Not apply | Not apply |
| Sample_1516s_sampl 3R452_FU!3R452_FU!subject3R4 M4  | Control | Not apply | Not apply | Not apply |
| Sample_1516s_sampl 3R_455_M3R_455_Msubject3R4 M4    | Control | Not apply | Not apply | Not apply |
| Sample_1516s_sampl 508_FU5_†508_FU5_†subject508 M4  | Control | Not apply | Not apply | Not apply |
| Sample_1516s_sampl 509_FU5_†509_FU5_†subject509 M4  | Control | Not apply | Not apply | Not apply |
| Sample_1516s_sampl 519_M5_p519_M5_psubject519 M4    | Control | Not apply | Not apply | Not apply |
| Sample_1516s_sampl 526_FU5_†526_FU5_†subject526 M4  | Control | Not apply | Not apply | Not apply |
| Sample_1616s_sampl 527_FU5_†527_FU5_†subject527 M4  | Control | Not apply | Not apply | Not apply |
| Sample_1616s_sampl 540_M5_L540_M5_Lsubject540 M4    | Control | Not apply | Not apply | Not apply |
| Sample_1616s_sampl 578_M5_L578_M5_Lsubject578 M4    | Control | Not apply | Not apply | Not apply |
| Sample_1616s_sampl 583_FU5_†583_FU5_†subject583 M4  | Control | Not apply | Not apply | Not apply |
| Sample_1616s_sampl 649_FU5_†649_FU5_†subject649 M4  | Control | Not apply | Not apply | Not apply |
| Sample_1616s_sampl 663_M5_L663_M5_Lsubject663 M4    | Control | Not apply | Not apply | Not apply |
| Sample_1616s_sampl 665_M5_p665_M5_psubject665 M4    | Control | Not apply | Not apply | Not apply |
| Sample_1616s_sampl 676_M5_L676_M5_Lsubject676 M4    | Control | Not apply | Not apply | Not apply |
| Sample_1616s_sampl 678_M5_p678_M5_psubject678 M4    | Control | Not apply | Not apply | Not apply |
| Sample_1616s_sampl 694_M5_p694_M5_psubject694 M4    | Control | Not apply | Not apply | Not apply |
| Sample_1716s_sampl 695_M5_L695_M5_Lsubject695 M4    | Control | Not apply | Not apply | Not apply |
| Sample_1716s_sampl 794_FU5_†794_FU5_†subject794 M4  | Control | Not apply | Not apply | Not apply |
| Sample_1716s_sampl 795_FU5_†795_FU5_†subject795 M4  | Control | Not apply | Not apply | Not apply |
| Sample_1716s_sampl 801_FU5_†801_FU5_†subject801 M4  | Control | Not apply | Not apply | Not apply |
| Sample_1716s_sampl 807_FU5_†807_FU5_†subject807 M4  | Control | Not apply | Not apply | Not apply |
| Sample_1716s_sampl 809_FU5_†809_FU5_†subject809 M4  | Control | Not apply | Not apply | Not apply |
| Sample_1716s_sampl 830_FU5_†830_FU5_†subject830 M4  | Control | Not apply | Not apply | Not apply |
| Sample_1716s_sampl 833_FU5_†833_FU5_†subject833 M4  | Control | Not apply | Not apply | Not apply |
| Sample_1716s_sampl 837_M5_L837_M5_Lsubject837 M4    | Control | Not apply | Not apply | Not apply |
| Sample_1716s_sampl 851_FU5_†851_FU5_†subject851 M4  | Control | Not apply | Not apply | Not apply |
| Sample_1816s_sampl 880_M5_L880_M5_Lsubject880 M4    | Control | Not apply | Not apply | Not apply |
| Sample_1816s_sampl 884_M5_L884_M5_Lsubject884 M4    | Control | Not apply | Not apply | Not apply |
| Sample_1816s_sampl 885_M5_p885_M5_psubject885 M4    | Control | Not apply | Not apply | Not apply |
| Sample_1816s_sampl 891_M5_L891_M5_Lsubject891 M4    | Control | Not apply | Not apply | Not apply |
| Sample_1816s_sampl 897_M5_L897_M5_Lsubject897 M4    | Control | Not apply | Not apply | Not apply |
| Sample_1816s_sampl 907_M5_L907_M5_Lsubject907 M4    | Control | Not apply | Not apply | Not apply |
| Sample_1816s_sampl 934_M5_L934_M5_Lsubject934 M4    | Control | Not apply | Not apply | Not apply |
| Sample_1816s_sampl 935_FU5_†935_FU5_†subject935 M4  | Control | Not apply | Not apply | Not apply |
| Sample_1816s_sampl P101_FU5_P101_FU5_subjectP10 M4  | Control | Not apply | Not apply | Not apply |
| Sample_1816s_sampl P201_FU5_P201_FU5_subjectP20 M4  | Control | Not apply | Not apply | Not apply |
| Sample_1916s_sampl P204_FU5_P204_FU5_subjectP20 M4  | Control | Not apply | Not apply | Not apply |
| Sample_1916s_sampl 3R451_FU(3R451_FU( subject3R4 M5 | Control | Not apply | Not apply | Not apply |
| Sample_1916s_sampl 3R452_FU(3R452_FU( subject3R4 M5 | Control | Not apply | Not apply | Not apply |
| Sample_1916s_sampl 3R_455_M3R_455_Msubject3R4 M5    | Control | Not apply | Not apply | Not apply |
| Sample_1916s_sampl 508_FU6_†508_FU6_†subject508 M5  | Control | Not apply | Not apply | Not apply |
| Sample_1916s_sampl 509_FU6_†509_FU6_†subject509 M5  | Control | Not apply | Not apply | Not apply |
| Sample_1916s_sampl 519_M6_p519_M6_psubject519 M5    | Control | Not apply | Not apply | Not apply |
| Sample_1916s_sampl 526_FU6_†526_FU6_†subject526 M5  | Control | Not apply | Not apply | Not apply |
| Sample_1916s_sampl 527_FU6_†527_FU6_†subject527 M5  | Control | Not apply | Not apply | Not apply |
| Sample_1916s_sampl 540_M6_L540_M6_Lsubject540 M5    | Control | Not apply | Not apply | Not apply |
| Sample_2016s_sampl 578_M6_L578_M6_Lsubject578 M5    | Control | Not apply | Not apply | Not apply |
| Sample_2016s_sampl 583_FU6_†583_FU6_†subject583 M5  | Control | Not apply | Not apply | Not apply |
| Sample_2016s_sampl 649_FU6_†649_FU6_†subject649 M5  | Control | Not apply | Not apply | Not apply |
| Sample_2016s_sampl 663_M6_L663_M6_Lsubject663 M5    | Control | Not apply | Not apply | Not apply |

|                                                      |             |           |           |           |
|------------------------------------------------------|-------------|-----------|-----------|-----------|
| Sample_2016s_sampl 665_M6_p 665_M6_p subject665 M5   | Control     | Not apply | Not apply | Not apply |
| Sample_2016s_sampl 676_M6_L 676_M6_L subject676 M5   | Control     | Not apply | Not apply | Not apply |
| Sample_2016s_sampl 678_M6_p 678_M6_p subject678 M5   | Control     | Not apply | Not apply | Not apply |
| Sample_2016s_sampl 694_M6_p 694_M6_p subject694 M5   | Control     | Not apply | Not apply | Not apply |
| Sample_2016s_sampl 695_M6_L 695_M6_L subject695 M5   | Control     | Not apply | Not apply | Not apply |
| Sample_2016s_sampl 794_FU6_f 794_FU6_f subject794 M5 | Control     | Not apply | Not apply | Not apply |
| Sample_2116s_sampl 795_FU6_f 795_FU6_f subject795 M5 | Control     | Not apply | Not apply | Not apply |
| Sample_2116s_sampl 801_FU6_f 801_FU6_f subject801 M5 | Control     | Not apply | Not apply | Not apply |
| Sample_2116s_sampl 807_FU6_f 807_FU6_f subject807 M5 | Control     | Not apply | Not apply | Not apply |
| Sample_2116s_sampl 809_FU6_f 809_FU6_f subject809 M5 | Control     | Not apply | Not apply | Not apply |
| Sample_2116s_sampl 830_FU6_f 830_FU6_f subject830 M5 | Control     | Not apply | Not apply | Not apply |
| Sample_2116s_sampl 833_FU6_f 833_FU6_f subject833 M5 | Control     | Not apply | Not apply | Not apply |
| Sample_2116s_sampl 837_M6_L 837_M6_L subject837 M5   | Control     | Not apply | Not apply | Not apply |
| Sample_2116s_sampl 851_FU6_f 851_FU6_f subject851 M5 | Control     | Not apply | Not apply | Not apply |
| Sample_2116s_sampl 880_M6_L 880_M6_L subject880 M5   | Control     | Not apply | Not apply | Not apply |
| Sample_2116s_sampl 884_M6_L 884_M6_L subject884 M5   | Control     | Not apply | Not apply | Not apply |
| Sample_2216s_sampl 885_M6_p 885_M6_p subject885 M5   | Control     | Not apply | Not apply | Not apply |
| Sample_2216s_sampl 891_M6_L 891_M6_L subject891 M5   | Control     | Not apply | Not apply | Not apply |
| Sample_2216s_sampl 897_M6_L 897_M6_L subject897 M5   | Control     | Not apply | Not apply | Not apply |
| Sample_2216s_sampl 907_M6_L 907_M6_L subject907 M5   | Control     | Not apply | Not apply | Not apply |
| Sample_2216s_sampl 934_M6_L 934_M6_L subject934 M5   | Control     | Not apply | Not apply | Not apply |
| Sample_2216s_sampl 935_FU6_f 935_FU6_f subject935 M5 | Control     | Not apply | Not apply | Not apply |
| Sample_2216s_sampl P101_FU6_P101_FU6 subjectP10 M5   | Control     | Not apply | Not apply | Not apply |
| Sample_2216s_sampl P201_FU6_P201_FU6 subjectP20 M5   | Control     | Not apply | Not apply | Not apply |
| Sample_2216s_sampl P204_FU6_P204_FU6 subjectP20 M5   | Control     | Not apply | Not apply | Not apply |
| Sample_2216s_sampl 3R443_M3 3R443_M3 subject443 M0   | interventic | NR        | R         | NR        |
| Sample_2316s_sampl 3R474_M3 3R474_M3 subject474 M0   | interventic | NR        | R         | NR        |
| Sample_2316s_sampl 3R478_M3 3R478_M3 subject478 M0   | interventic | NR        | NR        | R         |
| Sample_2316s_sampl 3R479_M3 3R479_M3 subject479 M0   | interventic | NR        | NR        | R         |
| Sample_2316s_sampl 3R481_M3 3R481_M3 subject481 M0   | interventic | NR        | NR        | R         |
| Sample_2316s_sampl 3R482_M3 3R482_M3 subject482 M0   | interventic | NR        | NR        | NR        |
| Sample_2316s_sampl 3R486_M3 3R486_M3 subject486 M0   | interventic | NR        | R         | R         |
| Sample_2316s_sampl 3R487_M3 3R487_M3 subject487 M0   | interventic | R         | R         | R         |
| Sample_2316s_sampl 3R488_M3 3R488_M3 subject488 M0   | interventic | R         | R         | NR        |
| Sample_2316s_sampl 3R492_M3 3R492_M3 subject492 M0   | interventic | NR        | R         | NR        |
| Sample_2316s_sampl 3R493_M3 3R493_M3 subject493 M0   | interventic | NR        | R         | R         |
| Sample_2416s_sampl 3R495_M3 3R495_M3 subject495 M0   | interventic | NR        | R         | NR        |
| Sample_2416s_sampl 3R496_M3 3R496_M3 subject496 M0   | interventic | NR        | NR        | NR        |
| Sample_2416s_sampl 3R506_M3 3R506_M3 subject506 M0   | interventic | NR        | NR        | NR        |
| Sample_2416s_sampl 3R512_M3 3R512_M3 subject512 M0   | interventic | NR        | NR        | R         |
| Sample_2416s_sampl 863_M1_L 863_M1_L subject863 M0   | interventic | NR        | R         | R         |
| Sample_2416s_sampl P10_M1_p P10_M1_p subject10 M0    | interventic | R         | R         | R         |
| Sample_2416s_sampl P115_M1_P115_M1 subjectP11 M0     | interventic | NR        | R         | R         |
| Sample_2416s_sampl P11_M3_p P11_M3_p subject11 M0    | interventic | NR        | NR        | R         |
| Sample_2416s_sampl P121_M1_P121_M1 subjectP12 M0     | interventic | NR        | R         | NR        |
| Sample_2416s_sampl P125_M1_P125_M1 subjectP12 M0     | interventic | NR        | R         | R         |
| Sample_2516s_sampl P127_M1_P127_M1 subjectP12 M0     | interventic | NR        | R         | R         |
| Sample_2516s_sampl P129_M1_P129_M1 subjectP12 M0     | interventic | NR        | R         | R         |
| Sample_2516s_sampl P13_M3_p P13_M3_p subjectP13 M0   | interventic | NR        | NR        | R         |
| Sample_2516s_sampl P13_M7_p P13_M7_p subject13 M0    | interventic | NR        | R         | R         |
| Sample_2516s_sampl P140_M1_P140_M1 subjectP14 M0     | interventic | NR        | NR        | NR        |

|                                                     |                |    |    |
|-----------------------------------------------------|----------------|----|----|
| Sample_25 16s_sampl P143_M1_ P143_M1_ subjectP14 M0 | interventic R  | R  | R  |
| Sample_25 16s_sampl P145_M1_ P145_M1_ subjectP14 M0 | interventic R  | R  | R  |
| Sample_25 16s_sampl P147_M1_ P147_M1_ subjectP14 M0 | interventic R  | R  | NR |
| Sample_25 16s_sampl P149_M1_ P149_M1_ subjectP14 M0 | interventic NR | R  | R  |
| Sample_25 16s_sampl P150_M1_ P150_M1_ subjectP15 M0 | interventic R  | NR | NR |
| Sample_26 16s_sampl P16_M3_p P16_M3_p subject16 M0  | interventic NR | R  | R  |
| Sample_26 16s_sampl P18_M3_p P18_M3_p subject18 M0  | interventic NR | NR | NR |
| Sample_26 16s_sampl P19_M3_p P19_M3_p subject19 M0  | interventic NR | NR | R  |
| Sample_26 16s_sampl P1_M3_ph P1_M3_ph subject1 M0   | interventic NR | NR | NR |
| Sample_26 16s_sampl P2_M3_ph P2_M3_ph subject2 M0   | interventic R  | R  | R  |
| Sample_26 16s_sampl P6_M3_ph P6_M3_ph subject6 M0   | interventic NR | R  | R  |
| Sample_26 16s_sampl P7_M3_ph P7_M3_ph subject7 M0   | interventic R  | R  | R  |
| Sample_26 16s_sampl 3R443_M4 3R443_M4 subject443 M1 | interventic NR | R  | NR |
| Sample_26 16s_sampl 3R474_M4 3R474_M4 subject474 M1 | interventic NR | R  | NR |
| Sample_26 16s_sampl 3R478_M4 3R478_M4 subject478 M1 | interventic NR | NR | R  |
| Sample_27 16s_sampl 3R481_M4 3R481_M4 subject481 M1 | interventic NR | NR | R  |
| Sample_27 16s_sampl 3R482_M4 3R482_M4 subject482 M1 | interventic NR | NR | NR |
| Sample_27 16s_sampl 3R486_M4 3R486_M4 subject486 M1 | interventic NR | R  | R  |
| Sample_27 16s_sampl 3R487_M4 3R487_M4 subject487 M1 | interventic R  | R  | R  |
| Sample_27 16s_sampl 3R488_M4 3R488_M4 subject488 M1 | interventic R  | R  | NR |
| Sample_27 16s_sampl 3R492_M4 3R492_M4 subject492 M1 | interventic NR | R  | NR |
| Sample_27 16s_sampl 3R493_M4 3R493_M4 subject493 M1 | interventic NR | R  | R  |
| Sample_27 16s_sampl 3R495_M4 3R495_M4 subject495 M1 | interventic NR | R  | NR |
| Sample_27 16s_sampl 3R496_M4 3R496_M4 subject496 M1 | interventic NR | NR | NR |
| Sample_27 16s_sampl 3R506_M4 3R506_M4 subject506 M1 | interventic NR | NR | NR |
| Sample_28 16s_sampl 3R512_M4 3R512_M4 subject512 M1 | interventic NR | NR | R  |
| Sample_28 16s_sampl 863_M3_L 863_M3_L subject863 M1 | interventic NR | R  | R  |
| Sample_28 16s_sampl P10_M4_p P10_M4_p subject10 M1  | interventic R  | R  | R  |
| Sample_28 16s_sampl P115_M3_ P115_M3_ subjectP11 M1 | interventic NR | R  | R  |
| Sample_28 16s_sampl P11_M4_p P11_M4_p subject11 M1  | interventic NR | NR | R  |
| Sample_28 16s_sampl P121_M3_ P121_M3_ subjectP12 M1 | interventic NR | R  | NR |
| Sample_28 16s_sampl P125_M3_ P125_M3_ subjectP12 M1 | interventic NR | R  | R  |
| Sample_28 16s_sampl P127_M3_ P127_M3_ subjectP12 M1 | interventic NR | R  | R  |
| Sample_28 16s_sampl P129_M3_ P129_M3_ subjectP12 M1 | interventic NR | R  | R  |
| Sample_28 16s_sampl P13_M5_p P13_M5_p subjectP13 M1 | interventic NR | NR | R  |
| Sample_29 16s_sampl P134_M1_ P134_M1_ subject13 M1  | interventic NR | R  | R  |
| Sample_29 16s_sampl P140_M3_ P140_M3_ subjectP14 M1 | interventic NR | NR | NR |
| Sample_29 16s_sampl P143_M3_ P143_M3_ subjectP14 M1 | interventic R  | R  | R  |
| Sample_29 16s_sampl P145_M3_ P145_M3_ subjectP14 M1 | interventic R  | R  | R  |
| Sample_29 16s_sampl P147_M3_ P147_M3_ subjectP14 M1 | interventic R  | R  | NR |
| Sample_29 16s_sampl P149_M3_ P149_M3_ subjectP14 M1 | interventic NR | R  | R  |
| Sample_29 16s_sampl P150_M3_ P150_M3_ subjectP15 M1 | interventic R  | NR | NR |
| Sample_29 16s_sampl P16_M4_p P16_M4_p subject16 M1  | interventic NR | R  | R  |
| Sample_29 16s_sampl P18_M4_p P18_M4_p subject18 M1  | interventic NR | NR | NR |
| Sample_29 16s_sampl P19_M4_p P19_M4_p subject19 M1  | interventic NR | NR | R  |
| Sample_30 16s_sampl P1_M4_ph P1_M4_ph subject1 M1   | interventic NR | NR | NR |
| Sample_30 16s_sampl P2_M4_ph P2_M4_ph subject2 M1   | interventic R  | R  | R  |
| Sample_30 16s_sampl P6_M4_ph P6_M4_ph subject6 M1   | interventic NR | R  | R  |
| Sample_30 16s_sampl P7_M4_ph P7_M4_ph subject7 M1   | interventic R  | R  | R  |
| Sample_30 16s_sampl 3R443_M5 3R443_M5 subject443 M2 | interventic NR | R  | NR |
| Sample_30 16s_sampl 3R474_M5 3R474_M5 subject474 M2 | interventic NR | R  | NR |

|                                                    |                |    |    |
|----------------------------------------------------|----------------|----|----|
| Sample_3C16s_sampl 3R478_M5 3R478_M5 subject478 M2 | interventic NR | NR | R  |
| Sample_3C16s_sampl 3R479_M5 3R479_M5 subject479 M2 | interventic NR | NR | R  |
| Sample_3C16s_sampl 3R481_M5 3R481_M5 subject481 M2 | interventic NR | NR | R  |
| Sample_3C16s_sampl 3R482_M5 3R482_M5 subject482 M2 | interventic NR | NR | NR |
| Sample_3116s_sampl 3R486_M5 3R486_M5 subject486 M2 | interventic NR | R  | R  |
| Sample_3116s_sampl 3R487_M5 3R487_M5 subject487 M2 | interventic R  | R  | R  |
| Sample_3116s_sampl 3R488_M5 3R488_M5 subject488 M2 | interventic R  | R  | NR |
| Sample_3116s_sampl 3R492_M5 3R492_M5 subject492 M2 | interventic NR | R  | NR |
| Sample_3116s_sampl 3R493_M5 3R493_M5 subject493 M2 | interventic NR | R  | R  |
| Sample_3116s_sampl 3R495_M5 3R495_M5 subject495 M2 | interventic NR | R  | NR |
| Sample_3116s_sampl 3R496_M5 3R496_M5 subject496 M2 | interventic NR | NR | NR |
| Sample_3116s_sampl 3R506_M5 3R506_M5 subject506 M2 | interventic NR | NR | NR |
| Sample_3116s_sampl 3R512_M5 3R512_M5 subject512 M2 | interventic NR | NR | R  |
| Sample_3116s_sampl 863_M2_L 863_M2_L subject863 M2 | interventic NR | R  | R  |
| Sample_3216s_sampl P10_M5_p P10_M5_p subject10 M2  | interventic R  | R  | R  |
| Sample_3216s_sampl P115_M2_ P115_M2_ subjectP11 M2 | interventic NR | R  | R  |
| Sample_3216s_sampl P11_M5_p P11_M5_p subject11 M2  | interventic NR | NR | R  |
| Sample_3216s_sampl P121_M2_ P121_M2_ subjectP12 M2 | interventic NR | R  | NR |
| Sample_3216s_sampl P125_M2_ P125_M2_ subjectP12 M2 | interventic NR | R  | R  |
| Sample_3216s_sampl P127_M2_ P127_M2_ subjectP12 M2 | interventic NR | R  | R  |
| Sample_3216s_sampl P129_M2_ P129_M2_ subjectP12 M2 | interventic NR | R  | R  |
| Sample_3216s_sampl P13_M4_p P13_M4_p subjectP13 M2 | interventic NR | NR | R  |
| Sample_3216s_sampl P134_M2_ P134_M2_ subject13 M2  | interventic NR | R  | R  |
| Sample_3216s_sampl P140_M2_ P140_M2_ subjectP14 M2 | interventic NR | NR | NR |
| Sample_3316s_sampl P143_M2_ P143_M2_ subjectP14 M2 | interventic R  | R  | R  |
| Sample_3316s_sampl P145_M2_ P145_M2_ subjectP14 M2 | interventic R  | R  | R  |
| Sample_3316s_sampl P147_M2_ P147_M2_ subjectP14 M2 | interventic R  | R  | NR |
| Sample_3316s_sampl P149_M2_ P149_M2_ subjectP14 M2 | interventic NR | R  | R  |
| Sample_3316s_sampl P150_M2_ P150_M2_ subjectP15 M2 | interventic R  | NR | NR |
| Sample_3316s_sampl P16_M5_p P16_M5_p subject16 M2  | interventic NR | R  | R  |
| Sample_3316s_sampl P18_M5_p P18_M5_p subject18 M2  | interventic NR | NR | NR |
| Sample_3316s_sampl P19_M5_p P19_M5_p subject19 M2  | interventic NR | NR | R  |
| Sample_3316s_sampl P1_M5_ph P1_M5_ph subject1 M2   | interventic NR | NR | NR |
| Sample_3316s_sampl P2_M5_ph P2_M5_ph subject2 M2   | interventic R  | R  | R  |
| Sample_3416s_sampl P6_M5_ph P6_M5_ph subject6 M2   | interventic NR | R  | R  |
| Sample_3416s_sampl P7_M5_ph P7_M5_ph subject7 M2   | interventic R  | R  | R  |
| Sample_3416s_sampl 3R443_M6 3R443_M6 subject443 M3 | interventic NR | R  | NR |
| Sample_3416s_sampl 3R474_M6 3R474_M6 subject474 M3 | interventic NR | R  | NR |
| Sample_3416s_sampl 3R478_M6 3R478_M6 subject478 M3 | interventic NR | NR | R  |
| Sample_3416s_sampl 3R479_M6 3R479_M6 subject479 M3 | interventic NR | NR | R  |
| Sample_3416s_sampl 3R481_M6 3R481_M6 subject481 M3 | interventic NR | NR | R  |
| Sample_3416s_sampl 3R482_M6 3R482_M6 subject482 M3 | interventic NR | NR | NR |
| Sample_3416s_sampl 3R486_M6 3R486_M6 subject486 M3 | interventic NR | R  | R  |
| Sample_3416s_sampl 3R487_M6 3R487_M6 subject487 M3 | interventic R  | R  | R  |
| Sample_3516s_sampl 3R488_M6 3R488_M6 subject488 M3 | interventic R  | R  | NR |
| Sample_3516s_sampl 3R492_M6 3R492_M6 subject492 M3 | interventic NR | R  | NR |
| Sample_3516s_sampl 3R493_M6 3R493_M6 subject493 M3 | interventic NR | R  | R  |
| Sample_3516s_sampl 3R495_M6 3R495_M6 subject495 M3 | interventic NR | R  | NR |
| Sample_3516s_sampl 3R496_M6 3R496_M6 subject496 M3 | interventic NR | NR | NR |
| Sample_3516s_sampl 3R506_M6 3R506_M6 subject506 M3 | interventic NR | NR | NR |
| Sample_3516s_sampl 3R512_M6 3R512_M6 subject512 M3 | interventic NR | NR | R  |

|                                                    |                |    |    |
|----------------------------------------------------|----------------|----|----|
| Sample_3516s_sampl 863_M4_L 863_M4_L subject863 M3 | interventic NR | R  | R  |
| Sample_3516s_sampl P10_M6_p P10_M6_p subject10 M3  | interventic R  | R  | R  |
| Sample_3516s_sampl P115_M4_ P115_M4_ subjectP11 M3 | interventic NR | R  | R  |
| Sample_3616s_sampl P121_M4_ P121_M4_ subjectP12 M3 | interventic NR | R  | NR |
| Sample_3616s_sampl P125_M4_ P125_M4_ subjectP12 M3 | interventic NR | R  | R  |
| Sample_3616s_sampl P127_M4_ P127_M4_ subjectP12 M3 | interventic NR | R  | R  |
| Sample_3616s_sampl P129_M4_ P129_M4_ subjectP12 M3 | interventic NR | R  | R  |
| Sample_3616s_sampl P13_M6_p P13_M6_p subjectP13 M3 | interventic NR | NR | R  |
| Sample_3616s_sampl P134_M3_ P134_M3_ subject13 M3  | interventic NR | R  | R  |
| Sample_3616s_sampl P140_M4_ P140_M4_ subjectP14 M3 | interventic NR | NR | NR |
| Sample_3616s_sampl P143_M4_ P143_M4_ subjectP14 M3 | interventic R  | R  | R  |
| Sample_3616s_sampl P145_M4_ P145_M4_ subjectP14 M3 | interventic R  | R  | R  |
| Sample_3616s_sampl P147_M4_ P147_M4_ subjectP14 M3 | interventic R  | R  | NR |
| Sample_3716s_sampl P149_M4_ P149_M4_ subjectP14 M3 | interventic NR | R  | R  |
| Sample_3716s_sampl P150_M4_ P150_M4_ subjectP15 M3 | interventic R  | NR | NR |
| Sample_3716s_sampl P16_M6_p P16_M6_p subject16 M3  | interventic NR | R  | R  |
| Sample_3716s_sampl P18_M6_p P18_M6_p subject18 M3  | interventic NR | NR | NR |
| Sample_3716s_sampl P19_M6_p P19_M6_p subject19 M3  | interventic NR | NR | R  |
| Sample_3716s_sampl P1_M6_ph P1_M6_ph subject1 M3   | interventic NR | NR | NR |
| Sample_3716s_sampl P2_M6_ph P2_M6_ph subject2 M3   | interventic R  | R  | R  |
| Sample_3716s_sampl P6_M6_ph P6_M6_ph subject6 M3   | interventic NR | R  | R  |
| Sample_3716s_sampl P7_M6_ph P7_M6_ph subject7 M3   | interventic R  | R  | R  |
| Sample_3716s_sampl 3R443_M7 3R443_M7 subject443 M4 | interventic NR | R  | NR |
| Sample_3816s_sampl 3R474_M7 3R474_M7 subject474 M4 | interventic NR | R  | NR |
| Sample_3816s_sampl 3R478_M7 3R478_M7 subject478 M4 | interventic NR | NR | R  |
| Sample_3816s_sampl 3R479_M7 3R479_M7 subject479 M4 | interventic NR | NR | R  |
| Sample_3816s_sampl 3R481_M7 3R481_M7 subject481 M4 | interventic NR | NR | R  |
| Sample_3816s_sampl 3R482_M7 3R482_M7 subject482 M4 | interventic NR | NR | NR |
| Sample_3816s_sampl 3R486_M7 3R486_M7 subject486 M4 | interventic NR | R  | R  |
| Sample_3816s_sampl 3R487_M7 3R487_M7 subject487 M4 | interventic R  | R  | R  |
| Sample_3816s_sampl 3R492_M7 3R492_M7 subject492 M4 | interventic NR | R  | NR |
| Sample_3816s_sampl 3R493_M7 3R493_M7 subject493 M4 | interventic NR | R  | R  |
| Sample_3816s_sampl 3R495_M7 3R495_M7 subject495 M4 | interventic NR | R  | NR |
| Sample_3916s_sampl 3R496_M7 3R496_M7 subject496 M4 | interventic NR | NR | NR |
| Sample_3916s_sampl 3R506_M7 3R506_M7 subject506 M4 | interventic NR | NR | NR |
| Sample_3916s_sampl 3R512_M7 3R512_M7 subject512 M4 | interventic NR | NR | R  |
| Sample_3916s_sampl P10_M7_p P10_M7_p subject10 M4  | interventic R  | R  | R  |
| Sample_3916s_sampl P134_M4_ P134_M4_ subject13 M4  | interventic NR | R  | R  |
| Sample_3916s_sampl P16_M7_p P16_M7_p subject16 M4  | interventic NR | R  | R  |
| Sample_3916s_sampl P18_M7_p P18_M7_p subject18 M4  | interventic NR | NR | NR |
| Sample_3916s_sampl P1_M7_ph P1_M7_ph subject1 M4   | interventic NR | NR | NR |
| Sample_3916s_sampl P2_M7_ph P2_M7_ph subject2 M4   | interventic R  | R  | R  |
| Sample_3916s_sampl P6_M7_ph P6_M7_ph subject6 M4   | interventic NR | R  | R  |
| Sample_4016s_sampl P7_M7_ph P7_M7_ph subject7 M4   | interventic R  | R  | R  |
| Sample_4016s_sampl 3R474_M8 3R474_M8 subject474 M5 | interventic NR | R  | NR |
| Sample_4016s_sampl 3R478_M8 3R478_M8 subject478 M5 | interventic NR | NR | R  |
| Sample_4016s_sampl 3R479_M8 3R479_M8 subject479 M5 | interventic NR | NR | R  |
| Sample_4016s_sampl 3R481_M8 3R481_M8 subject481 M5 | interventic NR | NR | R  |
| Sample_4016s_sampl 3R482_M8 3R482_M8 subject482 M5 | interventic NR | NR | NR |
| Sample_4016s_sampl 3R487_M8 3R487_M8 subject487 M5 | interventic R  | R  | R  |
| Sample_4016s_sampl 3R488_M8 3R488_M8 subject488 M5 | interventic R  | R  | NR |

|                                                    |                |    |    |
|----------------------------------------------------|----------------|----|----|
| Sample_4C16s_sampl 3R495_M8 3R495_M8 subject495 M5 | interventic NR | R  | NR |
| Sample_4C16s_sampl 3R496_M8 3R496_M8 subject496 M5 | interventic NR | NR | NR |
| Sample_4116s_sampl 3R506_M8 3R506_M8 subject506 M5 | interventic NR | NR | NR |
| Sample_4116s_sampl 3R512_M8 3R512_M8 subject512 M5 | interventic NR | NR | R  |
| Sample_4116s_sampl P10_M8_p P10_M8_p subject10 M5  | interventic R  | R  | R  |
| Sample_4116s_sampl P16_M8_p P16_M8_p subject16 M5  | interventic NR | R  | R  |
| Sample_4116s_sampl P18_M8_p P18_M8_p subject18 M5  | interventic NR | NR | NR |
| Sample_4116s_sampl P19_M8_p P19_M8_p subject19 M5  | interventic NR | NR | R  |
| Sample_4116s_sampl P2_M8_ph P2_M8_ph subject2 M5   | interventic R  | R  | R  |
| Sample_4116s_sampl P6_M8_ph P6_M8_ph subject6 M5   | interventic NR | R  | R  |
| Sample_4116s_sampl P7_M8_ph P7_M8_ph subject7 M5   | interventic R  | R  | R  |
